# Supplementary material for: Long-Term Analysis of Resilience of the Oral Microbiome in Allogeneic Stem Cell Transplant Recipients
Source: MDPI journal article supplement (doi:10.3390/microorganisms10040734), 2022-03-29
Supplement: s1 [file s1]

# Long-Term Analysis of Resilience of the Oral Microbiome in Allogeneic Stem Cell Transplant Recipients

Alexa M.G.A. Laheij <sup>1,2,3,\*</sup>, Frederik R. Rozema <sup>1,3</sup>, Michael T. Brennan <sup>4</sup>, Inger von Bültzingslöwen <sup>5</sup>, Stephanie J.M. van Leeuwen <sup>6</sup>, Carin Potting <sup>7</sup>, Marie-Charlotte D.N.J.M. Huysmans <sup>6</sup>, Mette D. Hazenberg <sup>8</sup>, Bernd W. Brandt <sup>2</sup>, Egija Zaura <sup>2</sup>, Mark J. Buijs <sup>2</sup>, Johannes J. de Soet <sup>2</sup>, Nicole N.M. Blijlevens <sup>7</sup> and Judith E. Raber-Durlacher <sup>1,3</sup>

<sup>1</sup> Department of Oral Medicine, Academic Centre for Dentistry Amsterdam, University of Amsterdam and Vrije Universiteit Amsterdam, Amsterdam, The Netherlands; a.laheij@acta.nl; fred.rozema@acta.nl; j.raber.durlacher@acta.nl

<sup>2</sup> Department of Preventive Dentistry, Academic Centre for Dentistry Amsterdam, University of Amsterdam and Vrije Universiteit Amsterdam, Amsterdam, The Netherlands; a.laheij@acta.nl; b.brandt@acta.nl; e.zaura@acta.nl; m.buijs@acta.nl; j.d.soet@acta.nl

<sup>3</sup> Department of Oral and Maxillofacial Surgery, Amsterdam UMC, University of Amsterdam, Amsterdam, The Netherlands; a.laheij@acta.nl; fred.rozema@acta.nl; j.raber.durlacher@acta.nl

<sup>4</sup> Department of Oral Medicine, Atrium Health Carolinas Medical Centre, Charlotte, NC; Department of Otolaryngology/Head and Neck Surgery, Wake Forest University School of Medicine, Winston-Salem, NC, United States of America; Mike.Brennan@atriumhealth.org

<sup>5</sup> Department of Oral Microbiology and immunology, Institute of Odontology, The Sahlgrenska Academy, University of Gothenburg, Gothenburg, Sweden; ingervonb@hotmail.com

<sup>6</sup> Department of Dentistry, Radboud Institute for Health Sciences, Radboud university medical center, Nijmegen, The Netherlands; Stephanie.vanLeeuwen@radboudumc.nl; Marie-Charlotte.Huysmans@radboudumc.nl

<sup>7</sup> Department of Hematology, Radboud Institute for Health Sciences, Radboud university medical center, Nijmegen, The Netherlands; c.potting@hotmail.com; Nicole.Blijlevens@radboudumc.nl

<sup>8</sup> Department of Hematology, Amsterdam UMC, University of Amsterdam, Amsterdam, The Netherlands; m.d.hazenberg@amc.uva.nl

\* Correspondence: a.laheij@acta.nl

**Table S1.** Sequencing output control samples.

| mean ctrl reads per sample | mean exp reads per sample | ratio control/total control reads | ratio exp/total exp reads | taxonomy                                                  |
|----------------------------|---------------------------|-----------------------------------|---------------------------|-----------------------------------------------------------|
| 3.72                       | 0.16                      | 0.165                             | 9.52E-06                  | f__Comamonadaceae                                         |
| 2.69                       | 0.07                      | 0.119                             | 4.21E-06                  | f__Comamonadaceae; g__Leptothrix; s__sp_oral_taxon_025    |
| 1.69                       | 0                         | 0.075                             | 0                         | c__Alphaproteobacteria                                    |
| 1.45                       | 0.08                      | 0.064                             | 4.39E-06                  | f__Caulobacteraceae; g__Caulobacter; s__sp_oral_taxon_002 |

|      |      |       |          |                                                                     |
|------|------|-------|----------|---------------------------------------------------------------------|
| 1.41 | 0.08 | 0.063 | 4.58E-06 | f__Bradyrhizobiacea<br>e; g__Bosea;<br>s__vestrisii                 |
| 1.14 | 0.06 | 0.050 | 3.30E-06 | f__Burkholderiaceae<br>; g__Ralstonia;<br>s__sp._oral_taxon_4<br>06 |
| 1.03 | 0.05 | 0.046 | 2.75E-06 | c__Alphaproteobact<br>eria                                          |
| 1.03 | 0.02 | 0.046 | 9.15E-07 | f__Burkholderiaceae                                                 |

---
